# Supplementary material
Source: PubMed Central journal article supplement (PMC6054712)
Supplement: NIHMS979475-supplement-Supplement1.pdf [file NIHMS979475-supplement-Supplement1.pdf]

## Supplementary Online Content

Kelly KR, Jost RM, Dao L, Beauchamp CL, Leffler JN, Birch EE. Binocular iPad game vs patching for treatment of amblyopia in children: a randomized clinical trial. *JAMA Ophthalmol*. Published online November 10, 2016.  
doi:10.1001/jamaophthalmol.2016.4224

**eTable 1.** Inclusion and Exclusion Criteria

**eTable 2.** Baseline Characteristics

This supplementary material has been provided by the authors to give readers additional information about their work.

**eTable 1.** Inclusion and Exclusion Criteria

|                                                                                                                                        |
|----------------------------------------------------------------------------------------------------------------------------------------|
| <i>Inclusion criteria</i>                                                                                                              |
| Age 4-10 years                                                                                                                         |
| 0.3-0.8 logMAR amblyopic eye BCVA                                                                                                      |
| 0.1 logMAR or better fellow eye BCVA (0.2 logMAR or better for 4 year-olds)                                                            |
| ≥3 lines interocular difference                                                                                                        |
| ≥8 weeks in glasses (if needed) OR no change in BCVA with glasses at 2 visits separated by 4-6 weeks                                   |
| Amblyopia due to strabismus, anisometropia, or both meeting the following criteria:                                                    |
| Strabismus: acquired esotropia with or without a history of alignment surgery                                                          |
| Anisometropia: Hyperopic and/or astigmatic anisometropia ≥ 1.0 diopter spherical equivalent or astigmatism with or without microtropia |
| Combined mechanism: acquired esotropia and anisometropia with or without a history of alignment surgery                                |
| Good ocular alignment (no strabismus >4 PD)                                                                                            |
| Demonstrate ability to understand and play the binocular game at enrollment                                                            |
|                                                                                                                                        |
| <i>Exclusion criteria</i>                                                                                                              |
| Prematurity >8 weeks                                                                                                                   |
| Coexisting ocular or systemic disease                                                                                                  |
| Developmental delay                                                                                                                    |
| Myopic anisometropia                                                                                                                   |
| Prior binocular amblyopia treatment                                                                                                    |
|                                                                                                                                        |
|                                                                                                                                        |

**eTable 2.** Baseline Characteristics

|                                      | <b>Total<br/>(N=28)</b> | <b>Binocular game<br/>(n=14)</b> | <b>Patching<br/>(n=14)</b> |
|--------------------------------------|-------------------------|----------------------------------|----------------------------|
| Sex: F                               | 7                       | 3                                | 4                          |
| Age, years                           |                         |                                  |                            |
| 4–6                                  | 17                      | 9                                | 8                          |
| 7–10                                 | 11                      | 5                                | 6                          |
| Mean±SD, years                       | 6.78±1.44               | 6.60±1.39                        | 6.95±1.51                  |
|                                      |                         |                                  |                            |
| Prior amblyopia treatment            |                         |                                  |                            |
| None                                 | 8                       | 4                                | 4                          |
| Patching                             | 12                      | 7                                | 5                          |
| Atropine                             | 1                       | 1                                | 0                          |
| Patching + atropine                  | 7                       | 2                                | 5                          |
|                                      |                         |                                  |                            |
| Weeks in glasses                     |                         |                                  |                            |
| 8–13                                 | 3                       | 2                                | 1                          |
| >13–26                               | 3                       | 2                                | 1                          |
| >26                                  | 22                      | 10                               | 12                         |
|                                      |                         |                                  |                            |
| Cause of amblyopia                   |                         |                                  |                            |
| Strabismus                           | 9                       | 4                                | 5                          |
| Anisometropia                        | 14                      | 7                                | 7                          |
| Combined                             | 5                       | 3                                | 2                          |
|                                      |                         |                                  |                            |
| AE BCVA, logMAR (Snellen equivalent) |                         |                                  |                            |
| 0.3–0.6 (20/40–20/80)                | 23                      | 12                               | 11                         |
| 0.7–0.8 (20/100–20/125)              | 5                       | 2                                | 3                          |
| Mean±SD, logMAR                      | 0.48±0.14               | 0.46±0.14                        | 0.50±0.15                  |
|                                      | (~20/63±1.4 lines)      | (~20/63±1.4 lines)               | (20/63±1.5 lines)          |
|                                      |                         |                                  |                            |
| FE BCVA, logMAR (Snellen equivalent) |                         |                                  |                            |
| -0.1 (20/16)                         | 7                       | 4                                | 3                          |
| 0.0 (20/20)                          | 9                       | 4                                | 5                          |
| 0.1 (20/25)                          | 12                      | 6                                | 6                          |
| Mean±SD, logMAR                      | 0.02±0.08               | 0.01±0.09                        | 0.02±0.08                  |

|  |                    |                    |                    |
|--|--------------------|--------------------|--------------------|
|  | (~20/20±0.8 lines) | (~20/20±0.9 lines) | (~20/20±0.8 lines) |
|--|--------------------|--------------------|--------------------|
